# Supplementary material for: New mimic of zeolite: heterometallic organic host framework accommodating inorganic cations
Source: Royal Society of Chemistry journal article supplement (doi:10.1039/b927101e), 2010-01-01
Supplement: b927101e.pdf [file b927101e.pdf]

## **Supporting Information**

### **New Mimic of Zeolite: Heterometallic Organic Host Framework**

#### **Accommodating Inorganic Cations**

*Yu-Biao Chen, Yao Kang and Jian Zhang\**

State Key Laboratory of Structural Chemistry, Fujian Institute of Research on the  
Structure of Matter, The Chinese Academy of Sciences, Fuzhou, Fujian 350002, P. R.

China

All the syntheses were performed in polytetrafluoroethylene-lined stainless steel autoclaves under autogenous pressure. Reagents were purchased commercially and used without further purification. Elemental analyses (C and H) were performed on an EA1110 CHNS-0 CE elemental analyzer and Elemental analyses (Cu and Zn) were measured by an electron probe microanalyzer (EPMA-810). IR (KBr pellet) spectra were recorded on a Nicolet Magna 750FT-IR spectrometer. Thermal analysis was carried out on a Netzsch STA449C thermal analyzer from 40 to 700°C at a heating rate of 15°C/min. X-ray powder diffraction experiments were performed in a Rigaku Dmax 2500 instrument with a ultra 18Kw Cu rotating anode point source.

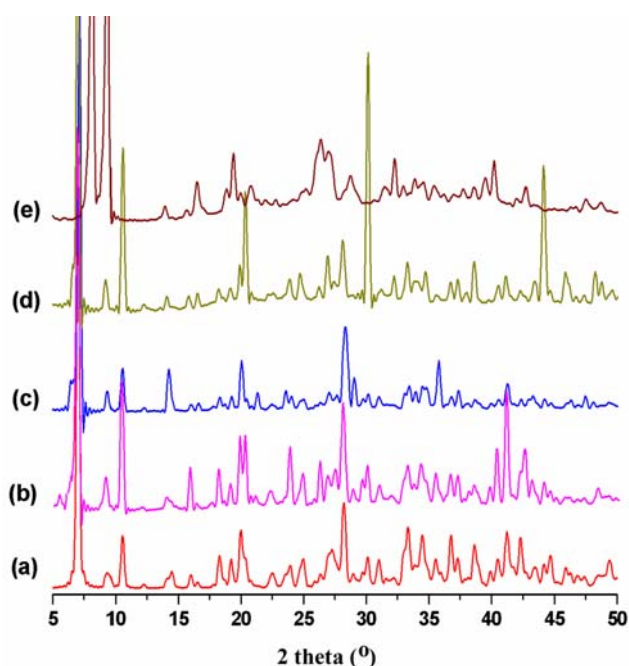

*Fig. S1* XPRD patterns of **1** (a: simulated powder patterns of **1**, b: powder sample of **1**, c: after heating **1** to 129°C for 5 h, d: after rehydration of sample c for 24 h, e: after heating **1** to 260°C for 5 h).

#### Elemental analysis

| Compounds                                                                                                    | Calc.             | Found             |
|--------------------------------------------------------------------------------------------------------------|-------------------|-------------------|
| $[\text{Na}_2(\text{H}_2\text{O})_{10}][\text{CuZn}_4(\text{OH})_4(\text{btec})_2]\cdot 2\text{H}_2\text{O}$ | C, 20.79; H, 2.79 | C, 20.85; H, 2.81 |
| $[\text{Li}_2(\text{H}_2\text{O})_{10}][\text{CuZn}_4(\text{OH})_4(\text{btec})_2]\cdot 2\text{H}_2\text{O}$ | C, 21.38; H, 2.87 | C, 21.53; H, 3.02 |
| $[\text{K}_2(\text{H}_2\text{O})_{10}][\text{CuZn}_4(\text{OH})_4(\text{btec})_2]\cdot 2\text{H}_2\text{O}$  | C, 20.23; H, 2.72 | C, 20.31; H, 2.65 |
